# Supplementary material for: Hydrothermal crystallization of a Ln2(OH)4SO4·nH2O layered compound for a wide range of Ln (Ln = La–Dy), thermolysis, and facile transformation into oxysulfate and oxysulfide phosphors
Source: Royal Society of Chemistry journal article supplement (doi:10.1039/c7ra00645d), 2017-01-01
Supplement: c7ra00645d10.pdf [file c7ra00645d10.pdf]

## Supporting Information for

Hydrothermal crystallization of  $\text{Ln}_2(\text{OH})_4\text{SO}_4 \cdot n\text{H}_2\text{O}$  layered compound for a wide range of Ln (Ln=La-Dy), thermolysis, and facile transformation into oxysulfate and oxysulfide phosphors

Xuejiao Wang,<sup>a,b,c,d</sup> Ji-Guang Li,<sup>a,b,c\*</sup> Maxim S. Molokeev,<sup>e,f</sup> Xiaojun Wang,<sup>g</sup> Weigang Liu,<sup>a,b</sup> Qi Zhu,<sup>a,b</sup> Hidehiko Tanaka,<sup>h</sup> Keiko Suzuta,<sup>h</sup> Byung-Nam Kim,<sup>c</sup> and Yoshio Sakka<sup>c</sup>

<sup>a</sup>Key Laboratory for Anisotropy and Texture of Materials (Ministry of Education), Northeastern University, Shenyang, Liaoning 110819, China

<sup>b</sup>Institute of Ceramics and Powder Metallurgy, School of Materials Science and Engineering, Northeastern University, Shenyang, Liaoning 110819, China

<sup>c</sup>Research Centre for Functional Materials, National Institute for Materials Science, Tsukuba, Ibaraki 305-0044, Japan

<sup>d</sup>College of New Energy, Bohai University, Jinzhou, Liaoning 121000, China

<sup>e</sup>Laboratory of Crystal Physics, Kirensky Institute of Physics, Federal Research Center KSC SB RAS, Krasnoyarsk 660036, Russia

<sup>f</sup>Department of Physics, Far Eastern State Transport University, Khabarovsk 680021, Russia

<sup>g</sup>School of Physics and Electronic Engineering, Jiangsu Normal University, Xuzhou, Jiangsu 221116, China

<sup>h</sup>World Premier International Centre for Materials Nanoarchitectonics (WPI-MANA), National Institute for Materials Science, Tsukuba, Ibaraki 305-0044, Japan

\*Corresponding author

National Institute for Materials Science

Tel: +81-29-860-4394

E-mail: [LI.Jiguang@nims.go.jp](mailto:LI.Jiguang@nims.go.jp)

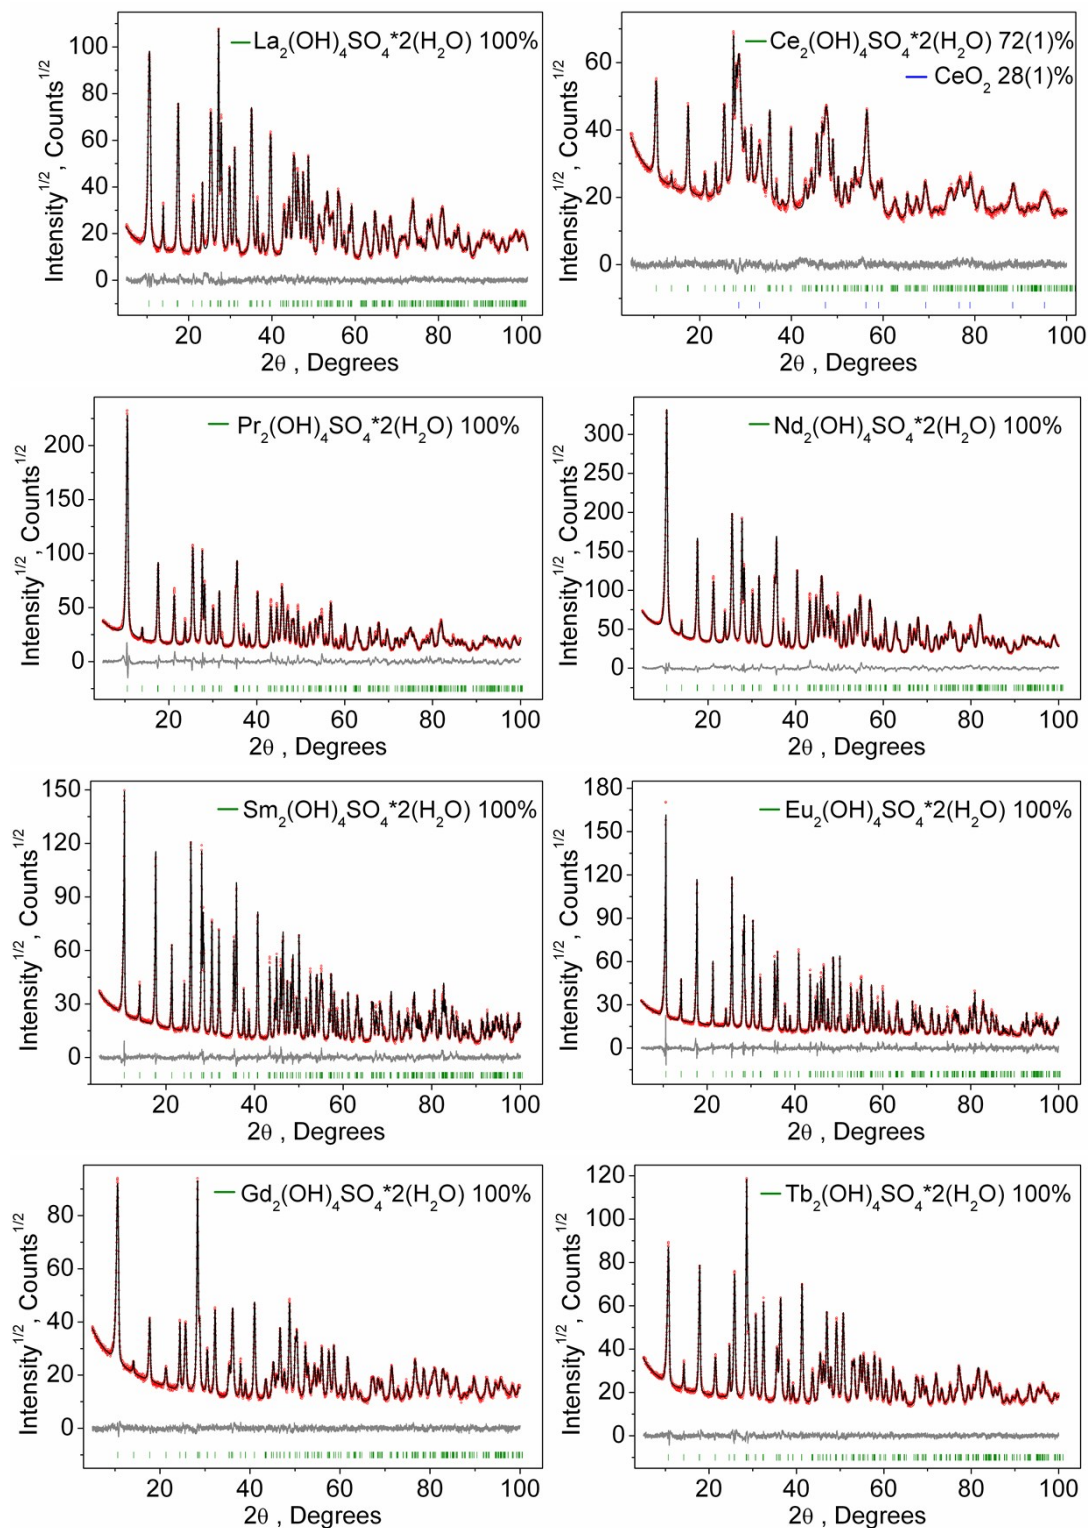

**Fig. S1** The observed (black) and calculated (red) XRD profiles and the difference (gray) for  $\text{Ln}_2(\text{OH})_4\text{SO}_4 \cdot n\text{H}_2\text{O}$  ( $\text{Ln}=\text{La-Tb}$ ). The Bragg reflections are indicated with green tick marks.

Figure S1 shows the results of Rietveld structure refinements for the sulfate-type layered hydroxides using the crystallographic data of their  $\text{La}_2(\text{OH})_4\text{SO}_4 \cdot n\text{H}_2\text{O}$  analogue as initial structure model.<sup>1</sup> All the above refinements are stable and give well acceptable reliability factors (Table S2).

**Table S1** Results of elemental analysis and the derived chemical formula for the typical compounds hydrothermally obtained at 100 °C and pH=9. Nitrogen and carbon were assumed to solely come from  $\text{NO}_3^-$  and  $\text{CO}_3^{2-}$ , respectively, which were assumed to replace  $\text{OH}^-$ . The amount of  $\text{OH}^-$  was derived from molecular neutrality, and the water content was calculated with the Ln content.

|    | Results of elemental analysis (wt%) |      |      |      | Chemical formula                                                                                                         |
|----|-------------------------------------|------|------|------|--------------------------------------------------------------------------------------------------------------------------|
|    | Ln                                  | S    | N    | C    |                                                                                                                          |
|    | La                                  | 56.9 | 6.9  | 0.04 |                                                                                                                          |
| Pr | 57.4                                | 6.8  | 0.18 | 0.22 | $\text{Pr}_2(\text{OH})_{3.68}(\text{SO}_4)_{1.04}(\text{NO}_3)_{0.06}(\text{CO}_3)_{0.09} \cdot 2.09\text{H}_2\text{O}$ |
| Eu | 60.4                                | 6.5  | 0.16 | 0.09 | $\text{Eu}_2(\text{OH})_{3.85}(\text{SO}_4)_{1.02}(\text{NO}_3)_{0.05}(\text{CO}_3)_{0.03} \cdot 1.70\text{H}_2\text{O}$ |
| Gd | 62.0                                | 5.2  | 0.26 | 0.23 | $\text{Gd}_2(\text{OH})_{4.07}(\text{SO}_4)_{0.83}(\text{NO}_3)_{0.09}(\text{CO}_3)_{0.09} \cdot 1.82\text{H}_2\text{O}$ |
| Tb | 64.0                                | 3.2  | 0.10 | 0.12 | $\text{Tb}_2(\text{OH})_{4.86}(\text{SO}_4)_{0.50}(\text{NO}_3)_{0.04}(\text{CO}_3)_{0.05} \cdot 2.33\text{H}_2\text{O}$ |
| Ho | 64.8                                | 3.3  | 0.02 | 0.29 | $\text{Ho}_2(\text{OH})_{4.71}(\text{SO}_4)_{0.52}(\text{NO}_3)_{0.01}(\text{CO}_3)_{0.12} \cdot 2.24\text{H}_2\text{O}$ |
| Lu | 68.3                                | 3.7  | 0.06 | 0.26 | $\text{Lu}_2(\text{OH})_{4.58}(\text{SO}_4)_{0.59}(\text{NO}_3)_{0.02}(\text{CO}_3)_{0.11} \cdot 1.11\text{H}_2\text{O}$ |

**Table S2** Main parameters of processing and the reliability factors of refinement for  $\text{Ln}_2(\text{OH})_4\text{SO}_4 \cdot n\text{H}_2\text{O}$ .

| Phase                                                           | Weight (%) | Sp.gr.       | $R_{wp}$ , (%) | $R_p$ , (%) | $\chi^2$ | $R_B$ (%) |
|-----------------------------------------------------------------|------------|--------------|----------------|-------------|----------|-----------|
| $\text{La}_2(\text{OH})_4\text{SO}_4 \cdot n\text{H}_2\text{O}$ | 100        | <i>C2/m</i>  | 6.43           | 4.68        | 1.58     | 1.47      |
| $\text{Ce}_2(\text{OH})_4\text{SO}_4 \cdot n\text{H}_2\text{O}$ | 72 (1)     | <i>C2/m</i>  | 5.51           | 4.21        | 1.40     | 1.55      |
| $\text{CeO}_2$                                                  | 28 (1)     | <i>Fm-3m</i> |                |             |          |           |
| $\text{Pr}_2(\text{OH})_4\text{SO}_4 \cdot n\text{H}_2\text{O}$ | 100        | <i>C2/m</i>  | 11.65          | 9.40        | 3.58     | 4.00      |
| $\text{Nd}_2(\text{OH})_4\text{SO}_4 \cdot n\text{H}_2\text{O}$ | 100        | <i>C2/m</i>  | 6.38           | 4.82        | 3.52     | 2.70      |
| $\text{Sm}_2(\text{OH})_4\text{SO}_4 \cdot n\text{H}_2\text{O}$ | 100        | <i>C2/m</i>  | 7.73           | 5.91        | 1.99     | 3.54      |
| $\text{Eu}_2(\text{OH})_4\text{SO}_4 \cdot n\text{H}_2\text{O}$ | 100        | <i>C2/m</i>  | 10.47          | 8.11        | 2.50     | 3.77      |
| $\text{Gd}_2(\text{OH})_4\text{SO}_4 \cdot n\text{H}_2\text{O}$ | 100        | <i>C2/m</i>  | 5.97           | 4.53        | 1.27     | 1.04      |
| $\text{Tb}_2(\text{OH})_4\text{SO}_4 \cdot n\text{H}_2\text{O}$ | 100        | <i>C2/m</i>  | 5.51           | 4.24        | 1.46     | 0.90      |

|                                                                 |     |        |      |      |      |      |
|-----------------------------------------------------------------|-----|--------|------|------|------|------|
| $\text{Dy}_2(\text{OH})_4\text{SO}_4 \cdot n\text{H}_2\text{O}$ | 100 | $C2/m$ | 7.47 | 5.74 | 1.57 | 3.19 |
|-----------------------------------------------------------------|-----|--------|------|------|------|------|

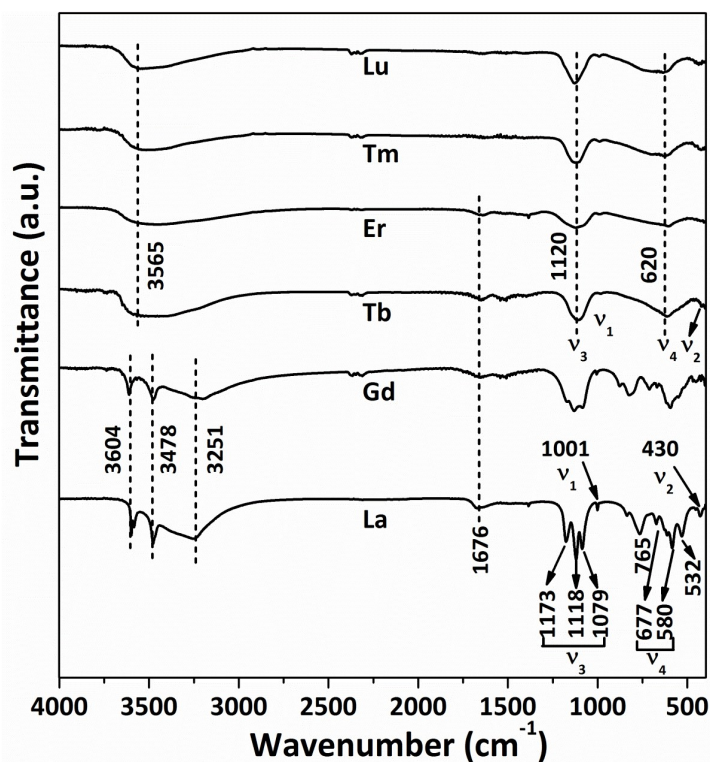

**Fig. S2** FTIR spectra of the typical hydrothermal products synthesized at 100 °C and pH~9.

The La-Gd products show FTIR behaviors similar to the  $\text{Ln}_2(\text{OH})_4\text{SO}_4 \cdot n\text{H}_2\text{O}$  layered compound as reported before.<sup>1,2</sup> The vibrations at  $\sim 3251$  and  $1676 \text{ cm}^{-1}$  can be attributed to the O-H stretching vibrations ( $\nu_1$  and  $\nu_3$ ) and H-O-H bending mode ( $\nu_2$ ) of hydration water in the structure, respectively, while the those at  $\sim 532$  and  $765 \text{ cm}^{-1}$  are originated from the bending modes of water molecules coordinated to metal ions.<sup>2,3</sup> The two separated sharp bands located at  $\sim 3604$  and  $3478 \text{ cm}^{-1}$  can be assigned to hydroxyl ( $\text{OH}^-$ ) groups.<sup>3</sup> The fundamental IR vibrations of  $\text{SO}_4^{2-}$  are documented to be located at  $\sim 1104$  ( $\nu_3$ ),  $981$  ( $\nu_1$ ),  $618$  ( $\nu_4$ ), and  $451 \text{ cm}^{-1}$  ( $\nu_2$ ), and, when the  $\text{SO}_4^{2-}$  tetrahedron is distorted, the  $\nu_3$  and  $\nu_4$  vibrations would split to give rise to two or three peaks with the resolution dependent on the magnitude of the splitting and  $\nu_1$  and  $\nu_2$  would become active. The  $\nu_1$ ,  $\nu_2$ ,  $\nu_3$ , and  $\nu_4$  fundamental vibrations of sulfate groups were all observed in the La-Gd products as labeled in the figure, with the  $\nu_3$  and  $\nu_4$  split into several peaks. These indicate that the sulfate groups are directly coordinated to the lanthanide cations

in the structure. Specifically, the  $\nu_3$  vibration of La-241 show better separated peaks than that of Gd-241, which may indicate that the distortion of  $\text{SO}_4^{2-}$  in the former is larger than that in the later.<sup>1,4</sup> The Tb-Lu products exhibit similar FTIR behaviors. The absorptions at  $\sim 3564$  and  $1676\text{ cm}^{-1}$  are attributable to the O-H stretching ( $\nu_1$  and  $\nu_3$ ) H-O-H bending ( $\nu_2$ ) vibrations of hydration water,<sup>4</sup> respectively. As for the  $\text{SO}_4^{2-}$  group, the  $\nu_3$  ( $1100\text{ cm}^{-1}$ ) and  $\nu_4$  ( $614\text{ cm}^{-1}$ ) bands are non-splitting but with the  $\nu_1$  ( $983\text{ cm}^{-1}$ ) and  $\nu_2$  ( $411\text{ cm}^{-1}$ ) vibrations identifiable in the spectra. Such FTIR behaviors may imply that the sulfate ions are not directly coordinated to the lanthanide centres in the hydroxide layers but the tetrahedron of  $\text{SO}_4^{2-}$  is slightly distorted owing to interaction of the  $\text{SO}_4^{2-}$  anions with the hydroxyls in the main layer via electrostatic attraction/hydrogen bonding. The almost the same FTIR behaviors of the Tm-Lu products and the Tb-Er products further confirm that the four compounds have similar functional groups.

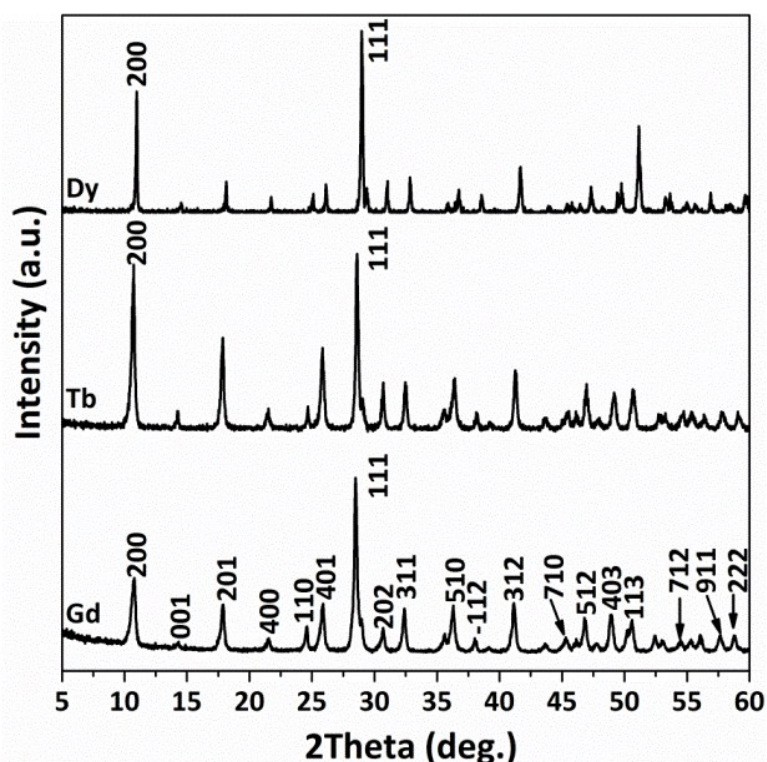

**Fig. S3** XRD patterns of the  $\text{Ln}_2(\text{OH})_4\text{SO}_4 \cdot n\text{H}_2\text{O}$  compounds synthesized at  $100\text{ }^\circ\text{C}$  and  $\text{pH}=7$  ( $\text{Ln}=\text{Gd}$ ,  $\text{Tb}$ , and  $\text{Dy}$ , as indicted in the figure).

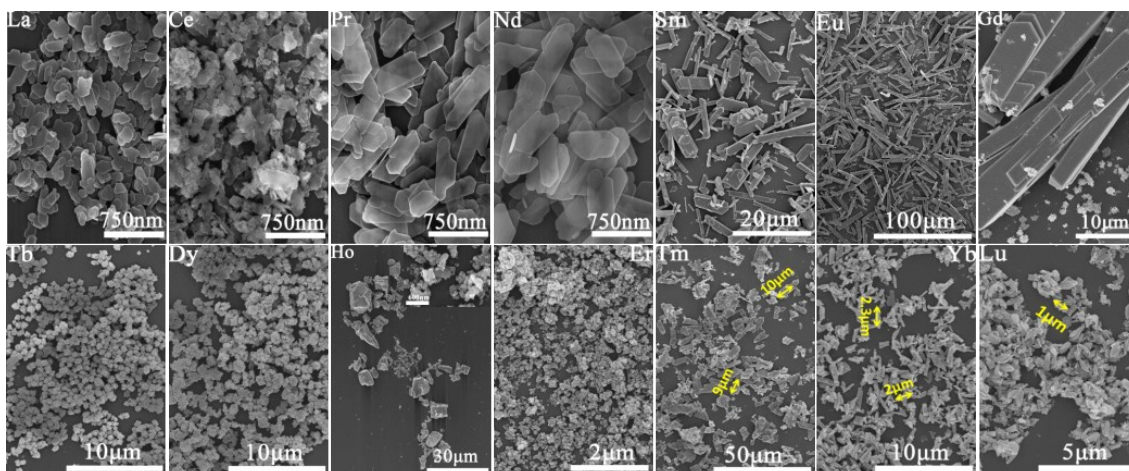

**Fig. S4** FE-SEM morphologies of the products hydrothermally synthesized at 100 °C and pH=9.

**Table S3** Lattice parameters and axis angle of  $\text{Ln}_2(\text{OH})_4\text{SO}_4 \cdot n\text{H}_2\text{O}$ .

| Sample                                                          | $a$ (Å)     | $b$ (Å)    | $c$ (Å)    | $\beta$ (°) | $V$ (Å <sup>3</sup> ) |
|-----------------------------------------------------------------|-------------|------------|------------|-------------|-----------------------|
| $\text{La}_2(\text{OH})_4\text{SO}_4 \cdot n\text{H}_2\text{O}$ | 16.8847 (6) | 3.9420 (1) | 6.4359 (2) | 90.454 (2)  | 428.36 (3)            |
| $\text{Ce}_2(\text{OH})_4\text{SO}_4 \cdot n\text{H}_2\text{O}$ | 16.8000 (2) | 3.8920 (4) | 6.3943 (8) | 90.445 (5)  | 418.08 (8)            |
| $\text{Pr}_2(\text{OH})_4\text{SO}_4 \cdot n\text{H}_2\text{O}$ | 16.7590 (2) | 3.8572 (5) | 6.3570 (9) | 90.391 (3)  | 410.92 (9)            |
| $\text{Nd}_2(\text{OH})_4\text{SO}_4 \cdot n\text{H}_2\text{O}$ | 16.7421 (6) | 3.8307 (1) | 6.3369 (3) | 90.296 (3)  | 406.40 (3)            |
| $\text{Sm}_2(\text{OH})_4\text{SO}_4 \cdot n\text{H}_2\text{O}$ | 16.6684 (2) | 3.7786 (5) | 6.2898 (8) | 90.208 (9)  | 396.14 (9)            |
| $\text{Eu}_2(\text{OH})_4\text{SO}_4 \cdot n\text{H}_2\text{O}$ | 16.6441 (3) | 3.7522 (9) | 6.2704 (1) | 90.114 (1)  | 391.60 (1)            |
| $\text{Gd}_2(\text{OH})_4\text{SO}_4 \cdot n\text{H}_2\text{O}$ | 16.6362 (8) | 3.7312 (1) | 6.2530 (3) | 90.064 (8)  | 388.14 (3)            |
| $\text{Tb}_2(\text{OH})_4\text{SO}_4 \cdot n\text{H}_2\text{O}$ | 16.5987 (6) | 3.7048 (1) | 6.2316 (2) | 90.091 (5)  | 383.21 (2)            |
| $\text{Dy}_2(\text{OH})_4\text{SO}_4 \cdot n\text{H}_2\text{O}$ | 16.5817 (4) | 3.6821 (6) | 6.2144 (1) | 90.034 (4)  | 379.43 (1)            |

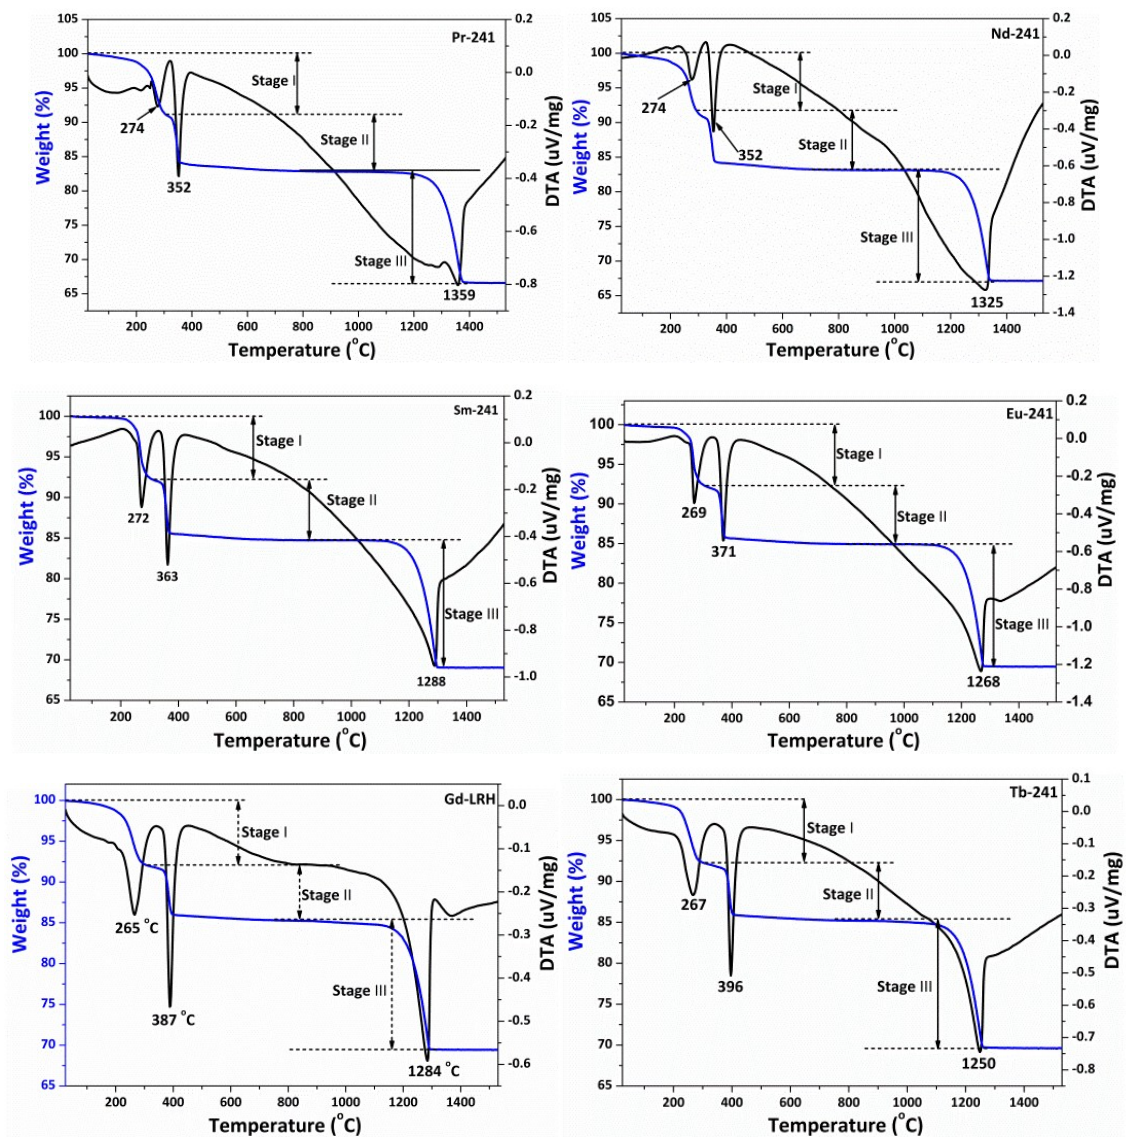

Fig. S5 TG/DTA curves of the Ln-241 compounds (Ln=Pr-Tb, as indicated in the figure).

**Table S4** Theoretical weight loss of different stages for the thermal decomposition of  $\text{Ln}_2(\text{OH})_4\text{SO}_4 \cdot n\text{H}_2\text{O}$  (Ln=La-Dy, except for Ce).

| Ln | Molecular weight | Theoretical weight loss of stage II (%) | Theoretical weight loss of stage III (%) | Theoretical total weight loss (%) |
|----|------------------|-----------------------------------------|------------------------------------------|-----------------------------------|
| La | 481.42           | 7.48                                    | 16.62                                    | 32.32                             |
| Pr | 488.50           | 7.37                                    | 16.38                                    | 32.48                             |
| Nd | 494.10           | 7.29                                    | 16.19                                    | 31.89                             |
| Sm | 503.98           | 7.14                                    | 15.87                                    | 30.76                             |
| Eu | 506.88           | 7.10                                    | 15.78                                    | 30.56                             |
| Gd | 516.88           | 6.96                                    | 15.48                                    | 29.96                             |
| Tb | 520.58           | 6.92                                    | 15.37                                    | 29.72                             |
| Dy | 525.48           | 6.85                                    | 15.22                                    | 28.99                             |

**Table S5** Lattice constants, axis angle and cell volume for the derived  $\text{Ln}_2\text{O}_2\text{SO}_4$ .

| Samples                            | $a$ (Å)    | $b$ (Å)   | $c$ (Å)   | $\beta$ (°) | $V$ (Å <sup>3</sup> ) |
|------------------------------------|------------|-----------|-----------|-------------|-----------------------|
| $\text{La}_2\text{O}_2\text{SO}_4$ | 14.3521(3) | 4.2855(4) | 8.3883(1) | 493.361(8)  | 107.01(2)             |
| $\text{Pr}_2\text{O}_2\text{SO}_4$ | 14.0543(2) | 4.2446(2) | 8.2835(2) | 472.291(6)  | 107.11(3)             |
| $\text{Nd}_2\text{O}_2\text{SO}_4$ | 13.9680(5) | 4.2253(5) | 8.2318(5) | 464.267(5)  | 107.13(4)             |
| $\text{Sm}_2\text{O}_2\text{SO}_4$ | 13.7495(6) | 4.2016(6) | 8.1666(6) | 450.521(8)  | 107.27(6)             |
| $\text{Eu}_2\text{O}_2\text{SO}_4$ | 13.6591(3) | 4.1901(2) | 8.1355(2) | 444.519(3)  | 107.31(7)             |
| $\text{Gd}_2\text{O}_2\text{SO}_4$ | 13.6028(4) | 4.1793(2) | 8.1047(2) | 439.816(3)  | 107.34(3)             |
| $\text{Tb}_2\text{O}_2\text{SO}_4$ | 13.4850(3) | 4.1675(1) | 8.0747(3) | 433.336(4)  | 107.27(2)             |
| $\text{Dy}_2\text{O}_2\text{SO}_4$ | 13.3950(5) | 4.1550(3) | 8.0478(6) | 427.207(1)  | 107.49(3)             |



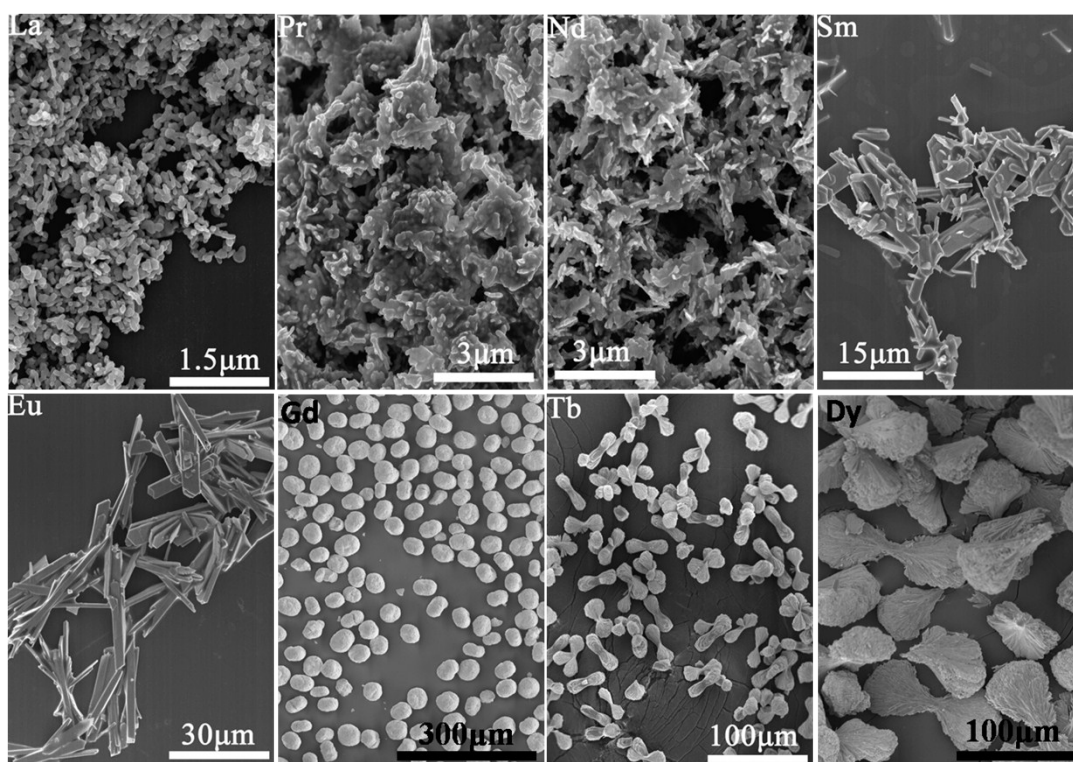

**Fig. S6** FE-SEM morphologies of the  $\text{Ln}_2\text{O}_2\text{SO}_4$  calcined from  $\text{Ln}_2(\text{OH})_4\text{SO}_4 \cdot n\text{H}_2\text{O}$  (Ln-241) at  $1000\text{ }^\circ\text{C}$  for 1 h in the air ( in Ar for Tb-241 and Pr-241).

**Table S6** Lattice constants, axis angle and cell volume for the derived  $\text{Ln}_2\text{O}_2\text{S}$ .

| Sample                          | $a$ (Å)   | $b$ (Å)   | $c$ (Å)   | $\alpha$ (°) | $\beta$ (°) | $\gamma$ (°) | $V$ (Å <sup>3</sup> ) |
|---------------------------------|-----------|-----------|-----------|--------------|-------------|--------------|-----------------------|
| $\text{La}_2\text{O}_2\text{S}$ | 4.0520(2) | 4.0520(5) | 6.9463(6) | 90           | 90          | 120          | 98.77(5)              |
| $\text{Pr}_2\text{O}_2\text{S}$ | 3.9682(3) | 3.9682(5) | 6.7861(4) | 90           | 90          | 120          | 92.54(2)              |
| $\text{Nd}_2\text{O}_2\text{S}$ | 3.9401(1) | 3.9401(8) | 6.7525(7) | 90           | 90          | 120          | 90.78(9)              |
| $\text{Sm}_2\text{O}_2\text{S}$ | 3.8851(5) | 3.8851(4) | 6.6534(8) | 90           | 90          | 120          | 86.97(7)              |
| $\text{Eu}_2\text{O}_2\text{S}$ | 3.8695(7) | 3.8695(2) | 6.6460(7) | 90           | 90          | 120          | 86.18(3)              |
| $\text{Gd}_2\text{O}_2\text{S}$ | 3.8484(6) | 3.8484(8) | 6.6406(9) | 90           | 90          | 120          | 85.17(4)              |
| $\text{Tb}_2\text{O}_2\text{S}$ | 3.8235(5) | 3.8235(3) | 6.5981(3) | 90           | 90          | 120          | 83.53(5)              |
| $\text{Dy}_2\text{O}_2\text{S}$ | 3.8016(3) | 3.8016(2) | 6.5564(7) | 90           | 90          | 120          | 82.06(6)              |

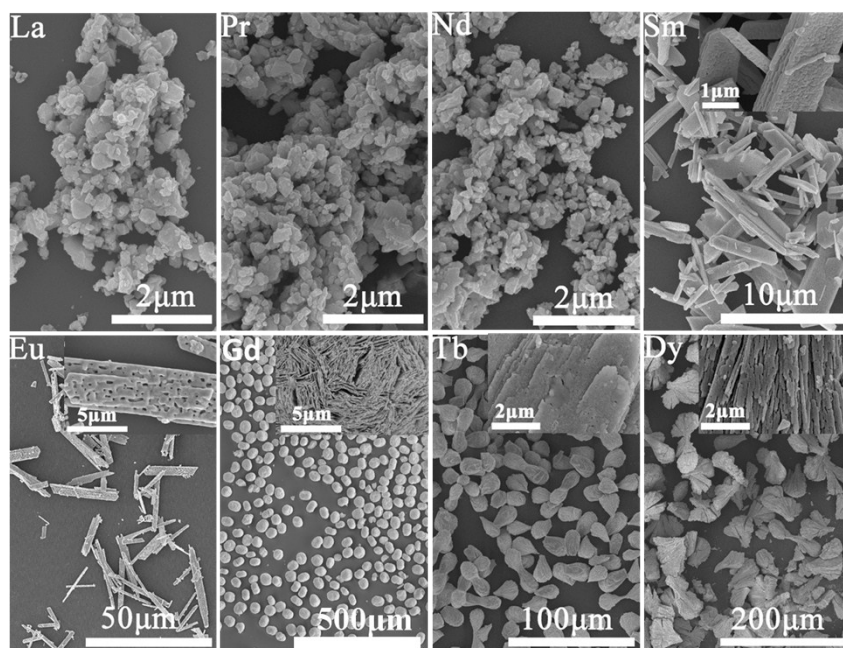

**Fig. S7** FE-SEM morphologies of the  $\text{Ln}_2\text{O}_2\text{S}$  calcined from  $\text{Ln}_2(\text{OH})_4\text{SO}_4 \cdot n\text{H}_2\text{O}$  in  $\text{H}_2$  at  $1200\text{ }^\circ\text{C}$  for 1 h (Ln=La-Dy, except for Ce). The insets are high resolution images.

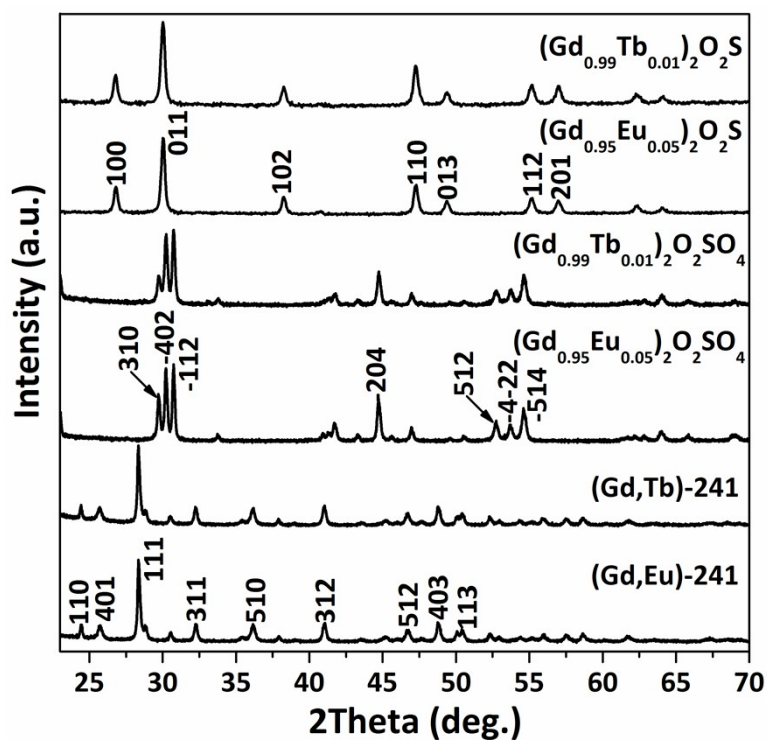

**Fig. S8** XRD patterns of  $(\text{Gd,RE})_2(\text{OH})_2\text{SO}_4 \cdot n\text{H}_2\text{O}$ ,  $(\text{Gd,RE})_2\text{O}_2\text{SO}_4$  and  $(\text{Gd,RE})_2\text{O}_2\text{S}$  (RE=5 at% Eu or 1 at% Tb).

**Table S7** Structure parameters of  $(\text{Gd,RE})_2(\text{OH})_2\text{SO}_4 \cdot n\text{H}_2\text{O}$ ,  $(\text{Gd,RE})_2\text{O}_2\text{SO}_4$  and  $(\text{Gd,RE})_2\text{O}_2\text{S}$  (RE=5 at% Eu or 1 at% Tb).

| Sample                                                      | Sp.Gr.  | $a$ (Å)    | $b$ (Å)   | $c$ (Å)   | $\alpha$ (°) | $\beta$ (°) | $\gamma$ (°) | $V$ (Å <sup>3</sup> ) |
|-------------------------------------------------------------|---------|------------|-----------|-----------|--------------|-------------|--------------|-----------------------|
| $(\text{Gd}_{0.95}\text{Eu}_{0.05})\text{-241}$             | $C2/m$  | 16.6381(7) | 3.7327(3) | 6.2582(6) | 90           | 90.266(5)   | 90           | 388.66(2)             |
| $(\text{Gd}_{0.99}\text{Tb}_{0.01})\text{-241}$             | $C2/m$  | 16.6127(4) | 3.7317(5) | 6.2466(8) | 90           | 90.264(7)   | 90           | 387.24(3)             |
| $(\text{Gd}_{0.95}\text{Eu}_{0.05})_2\text{O}_2\text{SO}_4$ | $C2/c$  | 13.6189(6) | 4.1810(8) | 8.1312(1) | 90           | 107.439(2)  | 90           | 441.71(4)             |
| $(\text{Gd}_{0.99}\text{Tb}_{0.01})_2\text{O}_2\text{SO}_4$ | $C2/c$  | 13.5971(3) | 4.1770(3) | 8.0997(2) | 90           | 107.463(8)  | 90           | 438.81(7)             |
| $(\text{Gd}_{0.95}\text{Eu}_{0.05})_2\text{O}_2\text{S}$    | $P-3m1$ | 3.8518(4)  | 3.8518(8) | 6.6686(3) | 90           | 90          | 120          | 85.68(6)              |
| $(\text{Gd}_{0.99}\text{Tb}_{0.01})_2\text{O}_2\text{S}$    | $P-3m1$ | 3.8500(7)  | 3.8500(9) | 6.6547(4) | 90           | 90          | 120          | 85.42(8)              |

Smaller lattice constants and cell volume were observed for the  $\text{Tb}^{3+}$  doped samples, owing to the smaller cation radius of  $\text{Tb}^{3+}$  (1.095 Å for CN=9) than that of  $\text{Eu}^{3+}$  (for 1.120 Å for CN=9).<sup>5</sup>

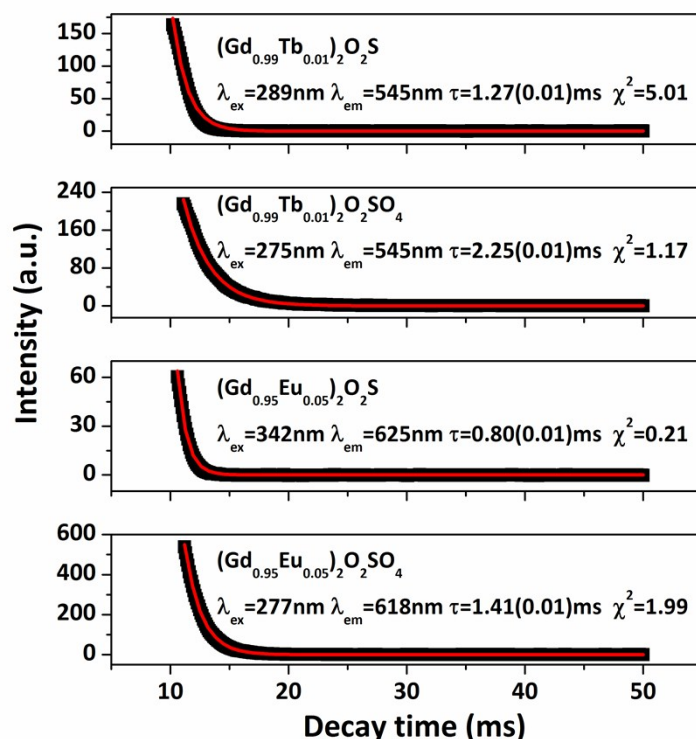

**Fig. S9** Fluorescence decay kinetics for the  $(\text{Gd,RE})_2\text{O}_2\text{SO}_4$  and  $(\text{Gd,RE})_2\text{O}_2\text{S}$  phosphors (RE=5 at% Eu or 1 at% Tb). The composition, excitation and emission wavelengths, derived fluorescence lifetime ( $\tau$ ), and the Chi-square ( $\chi^2$ ) factor of single-exponential fitting are indicated in the figure. For the lifetime, the number in bracket represents standard deviation. The experimental data are in black and the results of exponential fitting are in red.

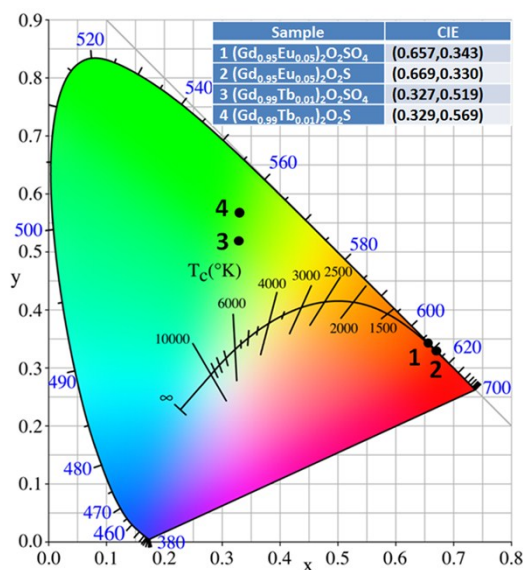

**Fig. S10** CIE chromaticity diagram for the emissions of (Gd,RE)<sub>2</sub>O<sub>2</sub>SO<sub>4</sub> and (Gd,RE)<sub>2</sub>O<sub>2</sub>S (RE=5 at% Eu or 1 at% Tb) phosphors.

The Eu<sup>3+</sup> and Tb<sup>3+</sup> doped phosphors emit vivid red and green colors. The color coordinates of (Gd,Eu)<sub>2</sub>O<sub>2</sub>SO<sub>4</sub> and (Gd,Eu)<sub>2</sub>O<sub>2</sub>S are located on the outer curved boundary in the CIE diagram. The outer boundary is called spectral locus, which corresponds to monochromatic light, and more saturated colors appear closer to the outer curved boundary in the CIE chromaticity diagram.<sup>6,7</sup> Therefore, the emissions of Eu<sup>3+</sup>-doped Gd<sub>2</sub>O<sub>2</sub>SO<sub>4</sub> and Gd<sub>2</sub>O<sub>2</sub>S are of good monochromatic lights with high color saturation.

#### Reference

1. X. J. Wang, J.-G. Li, M. S. Molokeev, et al. *Chem. Eng. J.*, 2016, **302**, 577.
2. J. B. Liang, R. Z. Ma, F. X. Geng, Y. Ebina, T. Sasaki, *Chem. Mater.*, 2010, **22**, 6001.
3. J. A. Gadsden, *Infrared spectra of minerals and related inorganic compounds*, Butterworth, Newton, MA, 1975.
4. F. X. Geng, R. Z. Ma, Y. Matsushita, J. B. Liang, Y. Michiue, T. Sasaki, *Inorg. Chem.*, 2011, **50**, 6667.
5. R. D. Shannon, *Acta Crystallogr.*, 1976, **A32**, 751.
6. R. L. Booker, *J. Opt. Soc. Am.* 1981, **71**, 139.
7. X.-Z. Huang, Z. Liu, Y. Y. Yang and Y. Tian, *Funct. Mater. Lett.*, 2013, **6**, 1350019.
